# Supplementary material
Source: PubMed Central journal article supplement (PMC3957425)
Supplement: NIHMS515299-supplement-08.pdf [file NIHMS515299-supplement-08.pdf]

**Table S1. qRT-PCR validation of microarrays.**

| <b>GENE</b> | <b>Microarray fold change</b> | <b>RTPCR fold change</b> | <b>RTPCR standard deviation</b> |
|-------------|-------------------------------|--------------------------|---------------------------------|
| MMP3/10a    | 1.065                         | 1.126                    | 0.072                           |
| TIMP1       | 0.752                         | 0.406                    | 0.054                           |
| Tenascin    | 0.631                         | 0.853                    | 0.086                           |

A subset of ECM remodeling genes from the microarray analysis were selected for qRT-PCR validation as previously described (Mercer et al., 2012). qRT-PCR was performed with tissue samples at 3 dpa (see Methods). Fold changes are derived from triplicate samples and presented as normalized  $\log_{10}$  values. The respective fold changes of the microarray data at 3 dpa are provided for comparison (Figure 1). dpa = days postamputation.
